# Supplementary material
Source: publisher site journal article supplement (https://www.dovepress.com/article/293913)
Supplement: Supplementary file 1 [file get_supplementary_file.php]

**Supplementary Table 1** Anthropometric and serum biochemical characteristics of subjects in the nine cities in Pearl River Delta, Guangdong Province, China

| **Variable** | **Age** | **BMI** | **SBP** | **DBP** | **Glu** | **TC** | **TG** | **UA** |
| --- | --- | --- | --- | --- | --- | --- | --- | --- |
| **Dongguan** |  |  |  |  |  |  |  |  |
| Male (n = 504) | 46.19 ± 9.29 | 24.57 ± 2.03 | 126.93 ± 12.62 | 86.03 ± 8.76 | 5.36 ± 1.52 | 5.24 ± 0.97 | 2.09 ± 1.80 | 393.49 ± 86.02 |
| Female (n = 266) | 35.05 ± 11.38** | 24.15 ± 2.04* | 123.57 ± 1.65* | 83.75 ± 8.28* | 4.78 ± 0.95** | 4.78 ± 0.89** | 1.26 ± 0.83** | 282.58 ± 62.46** |
| Hyperuricemia (n = 217) | 47.71 ± 10.59 | 25.14 ± 1.99 | 130.72 ± 14.09 | 90.43 ± 8.51 | 5.30 ± 1.16 | 5.29 ± 0.98 | 2.33 ± 1.52 | 470.41 ± 10.59 |
| Non-Hyperuricemia (n = 553) | 41.41 ± 11.54** | 24.15 ± 2.00** | 123.83 ± 11.08** | 83.21 ± 7.84** | 5.11 ± 1.45** | 5.00 ± 0.95** | 1.60 ± 1.57** | 309.96 ± 62.56** |
| **Foshan** |  |  |  |  |  |  |  |  |
| Male (n = 361) | 58.90 ± 16.62 | 24.30 ± 2.00 | 126.39 ± 12.31 | 85.87 ± 8.98 | 5.91 ± 2.12 | 5.42 ± 1.28 | 1.86 ± 1.64 | 419.87 ± 103.24 |
| Female (n = 460) | 60.79 ± 14.63 | 24.39 ± 2.14 | 126.29 ± 12.85 | 86.50 ± 8.68 | 5.91 ± 1.93 | 5.72 ± 1.17** | 1.55 ± 0.77 | 355.81 ± 96.68** |
| Hyperuricemia (n = 368) | 60.98 ± 15.73 | 24.95 ± 2.04 | 129.57 ± 13.68 | 89.14 ± 8.76 | 5.77 ± 1.43 | 5.72 ± 1.20 | 1.90 ± 1.37 | 469.10 ± 82.34 |
| Non-Hyperuricemia (n = 453) | 59.13 ± 15.38* | 23.86 ± 1.98** | 123.70 ± 10.99** | 83.85 ± 8.13** | 6.03 ± 2.38 | 5.48 ± 1.25** | 1.52 ± 1.09** | 314.82 ± 60.16** |
| **Gangzhou** |  |  |  |  |  |  |  |  |
| Male (n = 164) | 44.02 ± 10.74 | 24.24 ± 2.04 | 126.01 ± 12.03 | 85.43 ± 8.25 | 5.05 ± 1.04 | 4.96 ± 0.96 | 1.76 ± 1.24 | 377.95 ± 75.37 |
| Female (n = 439) | 40.10 ± 10.36** | 24.18 ± 2.02 | 124.48 ± 11.77 | 83.43 ± 8.31* | 4.87 ± 0.71 | 4.88 ± 0.93 | 1.23 ± 1.08** | 290.79 ± 72.05** |
| Hyperuricemia (n = 108) | 40.45 ± 10.82 | 24.93 ± 2.14 | 129.72 ± 13.35 | 88.74 ± 8.46 | 4.98 ± 0.76 | 5.05 ± 0.90 | 1.91 ± 1.53 | 439.68 ± 62.08 |
| Non-Hyperuricemia (n = 495) | 41.32 ± 10.56 | 24.04 ± 1.96** | 123.84 ± 11.24** | 82.93 ± 7.94** | 4.90 ± 0.82 | 4.87 ± 0.94 | 1.26 ± 1.01** | 287.18 ± 57.49** |
| **Huizhou** |  |  |  |  |  |  |  |  |
| Male (n = 654) | 36.63 ± 11.59 | 24.71 ± 2.04 | 127.92 ± 12.92 | 87.34 ± 8.97 | 5.40 ± 1.21 | 5.36 ± 1.07 | 1.82 ± 1.65 | 454.67 ± 104.28 |
| Female (n = 343) | 40.56 ± 12.42** | 24.39 ± 1.99* | 125.74 ± 11.88* | 85.42 ± 8.91* | 5.36 ± 1.18 | 5.23 ± 0.97 | 1.07 ± 0.76** | 318.94 ± 84.68** |
| Hyperuricemi­­a (n = 506) | 36.15 ± 11.94 | 25.07 ± 1.97 | 129.48 ± 13.43 | 89.73 ± 8.66 | 5.37 ± 0.93 | 5.46 ± 1.07 | 1.83 ± 1.50 | 499.14 ± 81.93 |
| Non-Hyperuricemia (n = 491) | 39.86 ± 11.82** | 24.12 ± 1.97** | 124.78 ± 11.24** | 83.54 ± 8.21** | 5.40 ± 1.43 | 5.16 ± 0.97** | 1.28 ± 1.35** | 314.01 ± 60.07** |
| **Jiangmen** |  |  |  |  |  |  |  |  |
| Male (n = 374) | 46.68 ± 14.84 | 24.80 ± 2.02 | 125.02 ± 12.56 | 84.93 ± 8.71 | 5.72 ± 1.80 | 5.44 ± 1.02 | 1.73 ± 1.71 | 375.71 ± 78.87 |
| Female (n = 216) | 45.53 ± 13.80 | 24.37 ± 1.99 | 123.59 ± 11.57 | 83.44 ± 8.02 | 5.42 ± 1.41* | 5.55 ± 1.09 | 1.16 ± 0.86** | 279.91 ± 62.98** |
| Hyperuricemia (n = 119) | 46.37 ± 17.20 | 24.79 ± 2.07 | 128.65 ± 13.88 | 89.55 ± 7.86 | 5.48 ± 1.14 | 5.46 ± 1.06 | 1.89 ± 1.74 | 462.81 ± 56.18 |
| Non-Hyperuricemia (n = 471) | 46.24 ± 13.71 | 24.19 ± 1.98* | 123.45 ± 11.54** | 83.08 ± 8.15** | 5.65 ± 1.78 | 5.49 ± 1.04 | 1.43 ± 1.39** | 309.77 ± 62.44** |
| **Shenzhen** |  |  |  |  |  |  |  |  |
| Male (n = 297) | 36.55 ± 11.12 | 24.06 ± 1.99 | 125.38 ± 11.38 | 83.83 ± 8.24 | 4.91 ± 0.35 | 4.67 ± 0.79 | 0.85 ± 0.63 | 291.43 ± 58.19 |
| Female (n = 307) | 37.11 ± 11.40 | 24.34 ± 1.91 | 124.15 ± 11.74 | 84.57 ± 8.93 | 5.25 ± 1.06** | 4.95 ± 1.02** | 1.12 ± 0.88** | 288.89 ± 61.72 |
| Hyperuricemia (n = 47) | 35.98 ± 7.95 | 25.51 ± 1.91 | 130.72 ± 14.13 | 90.70 ± 9.07 | 5.58 ± 1.34 | 5.22 ± 1.12 | 1.65 ± 1.08 | 408.72 ± 38.23 |
| Non-Hyperuricemia (n = 557) | 36.91 ± 11.49 | 24.09 ± 1.92** | 124.25 ± 11.20* | 83.66 ± 8.33** | 5.04 ± 0.74** | 4.78 ± 0.90* | 0.93 ± 0.72** | 280.13 ± 49.91** |
| **Zhaoqing** |  |  |  |  |  |  |  |  |
| Male (n = 304) | 47.10 ± 13.71 | 24.78 ± 1.91 | 127.93 ± 12.34 | 87.03 ± 8.48 | 5.44 ± 1.55 | 5.27 ± 0.91 | 1.83 ± 1.28 | 440.78 ± 89.56 |
| Female (n = 199) | 44.91 ± 12.39 | 24.32 ± 2.07* | 126.24 ± 12.57 | 85.88 ± 8.90 | 5.15 ± 0.88* | 5.21 ± 1.07 | 1.33 ± 0.85** | 330.66 ± 77.33** |
| Hyperuricemia (n = 217) | 48.75 ± 14.26 | 24.95 ± 1.97 | 129.98 ± 13.56 | 89.40 ± 8.49 | 5.34 ± 1.03 | 5.39 ± 1.11 | 1.60 ± 1.04 | 461.36 ± 71.95 |
| Non-Hyperuricemia (n = 286) | 43.52 ± 11.40** | 24.16 ± 1.99** | 124.58 ± 11.10** | 84.01 ± 8.21** | 5.21 ± 1.31* | 5.14 ± 0.91* | 1.47 ± 1.09* | 308.11 ± 54.37** |
| **Zhongshan** |  |  |  |  |  |  |  |  |
| Male (n = 512) | 43.64 ± 12.74 | 24.47 ± 2.06 | 126.22 ± 12.87 | 86.86 ± 8.79 | 5.71 ± 2.32 | 5.45 ± 1.11 | 1.84 ± 1.82 | 421.05 ± 104.80 |
| Female (n = 467) | 41.74 ± 12.91* | 24.40 ± 2.03 | 125.29 ± 12.44 | 85.43 ± 8.84* | 5.21 ± 1.31** | 5.24 ± 1.10* | 1.35 ± 2.47** | 339.30 ± 92.42** |
| Hyperuricemia (n = 403) | 42.52 ± 13.24 | 24.95 ± 2.00 | 129.69 ± 13.76 | 89.39 ± 9.02 | 5.56 ± 2.17 | 5.50 ± 1.20 | 1.97 ± 2.93 | 482.12 ± 78.44 |
| Non-Hyperuricemia (n = 576) | 42.89 ± 12.58 | 24.08 ± 2.00** | 123.03 ± 11.03** | 83.92 ± 7.98** | 5.41 ± 1.72* | 5.25 ± 1.35* | 1.34 ± 1.35** | 312.04 ± 57.37** |
| **Zhuhai** |  |  |  |  |  |  |  |  |
| Male (n = 270) | 60.87 ± 15.51 | 24.57 ± 2.04 | 127.71 ± 12.41 | 86.09 ± 8.86 | 6.12 ± 1.80 | 5.45 ± 1.23 | 1.66 ± 1.17 | 426.17 ± 117.56 |
| Female (n = 354) | 55.46 ± 20.14* | 24.21 ± 2.01* | 125.86 ± 12.07 | 84.76 ± 8.64 | 5.84 ± 1.61* | 5.75 ± 1.25* | 1.75 ± 1.46 | 319.27 ± 102.13** |
| Hyperuricemia (n = 225) | 63.53 ± 14.73 | 25.01 ± 2.04 | 130.18 ± 13.44 | 89.06 ± 8.58 | 6.09 ± 1.76 | 5.65 ± 1.32 | 1.86 ± 1.58 | 491.35 ± 93.72 |
| Non-Hyperuricemia (n = 399) | 54.57 ± 19.56** | 24.00 ± 1.95** | 124.68 ± 11.04** | 83.23 ± 8.14** | 5.88 ± 1.66 | 5.60 ± 1.21 | 1.62 ± 1.18 | 294.57 ± 63.64** |
| **All** |  |  |  |  |  |  |  |  |
| Male (n = 3335) | 45.63 ± 15.10 | 24.47 ± 2.03 | 126.68 ± 12.53 | 86.11 ± 8.80 | 5.53 ± 1.70 | 5.29 ± 1.08 | 1.76 ± 1.60 | 406.19 ± 104.43 |
| Female (n = 3156) | 45.25 ± 15.94* | 24.31 ± 2.03* | 125.15 ± 12.15** | 84.91 ± 8.70** | 5.33 ± 1.36** | 5.27 ± 1.12 | 1.33 ± 1.32** | 315.92 ± 86.64** |
| Hyperuricemia (n = 2210) | 47.07 ± 16.67 | 25.00 ± 2.01 | 129.77 ± 13.63 | 89.50 ± 8.66 | 5.53 ± 1.47 | 5.48 ± 1.14 | 1.90 ± 1.82 | 476.93 ± 79.03 |
| Non-Hyperuricemia (n = 4281) | 44.61 ± 14.82** | 24.08 ± 1.97** | 123.96 ± 11.17** | 83.48 ± 8.10** | 5.38 ± 1.58** | 5.18 ± 1.06** | 1.37 ± 1.24** | 303.13 ± 60.04** |

BMI body mass index, SBP systolic blood pressure, DBP diastolic blood pressure, Glu glucose, TC total cholesterol, TG triglycerides, UA uric acid, *P < 0.05, **: P < 0.001
